# Supplementary material for: Sorgen (ernst) nehmen: Die Covid-Impfung
Source: Springer Nature journal article supplement (doi:10.1007/s00058-021-1971-x), 2021-02-01
Supplement: MOESM1 [file 18823458]

## Literatur

### zum Beitrag „Die Sorgen (ernst) nehmen: Die Covid-Impfung“ von Dr. Ulrike Koock

*Heilberufe (73) 2/2021, S. 40-41*

[https://www.pei.de/DE/newsroom/dossier/coronavirus/coronavirus-inhalt.html;jsessionid=FF081DA2B271A0B367F35630485F4ED0.intranet221?nn=169730&cms\\_pos=2](https://www.pei.de/DE/newsroom/dossier/coronavirus/coronavirus-inhalt.html;jsessionid=FF081DA2B271A0B367F35630485F4ED0.intranet221?nn=169730&cms_pos=2)

<https://www.nejm.org/doi/full/10.1056/NEJMoa2034577?query=RP>

<https://www.aerztezeitung.de/Nachrichten/Vor-Anaphylaxie-bei-Corona-Impfung-wird-gewarnt-415495.html>

<https://www.pei.de/DE/arzneimittel/impfstoffe/covid-19/covid-19-node.html;jsessionid=A3D4F43F651D8A9B43E8A54FB8C95B0F.intranet212>

[https://www.ema.europa.eu/en/documents/product-information/comirnaty-epar-product-information\\_en.pdf](https://www.ema.europa.eu/en/documents/product-information/comirnaty-epar-product-information_en.pdf)

[https://www.ema.europa.eu/en/documents/product-information/covid-19-vaccine-moderna-product-information\\_en.pdf](https://www.ema.europa.eu/en/documents/product-information/covid-19-vaccine-moderna-product-information_en.pdf)

#### **Proteinsequenzen:**

<https://www.uniprot.org/uniprot/Q9UQF0>

<https://www.uniprot.org/uniprot/P0DTC2>

<https://www.uniprot.org/uniprot/P23008>

<https://www.uniprot.org/uniprot/A0A0K2RVW1>

[https://www.ajog.org/article/S0002-9378\(20\)31177-7/pdf](https://www.ajog.org/article/S0002-9378(20)31177-7/pdf)

<https://link.springer.com/article/10.1007/s00404-020-05848-0>

<https://jamanetwork.com/journals/jamanetworkopen/fullarticle/2773105>

<https://www.who.int/emergencies/diseases/novel-coronavirus-2019/advice-for-public/myth-busters>
